# Supplementary material
Source: PubMed Central journal article supplement (PMC2709354)

Supplementary Fig. S1. MS of the compound eluting at 7.8 min in Fig. 7F ( $\alpha$ -amanitin product).

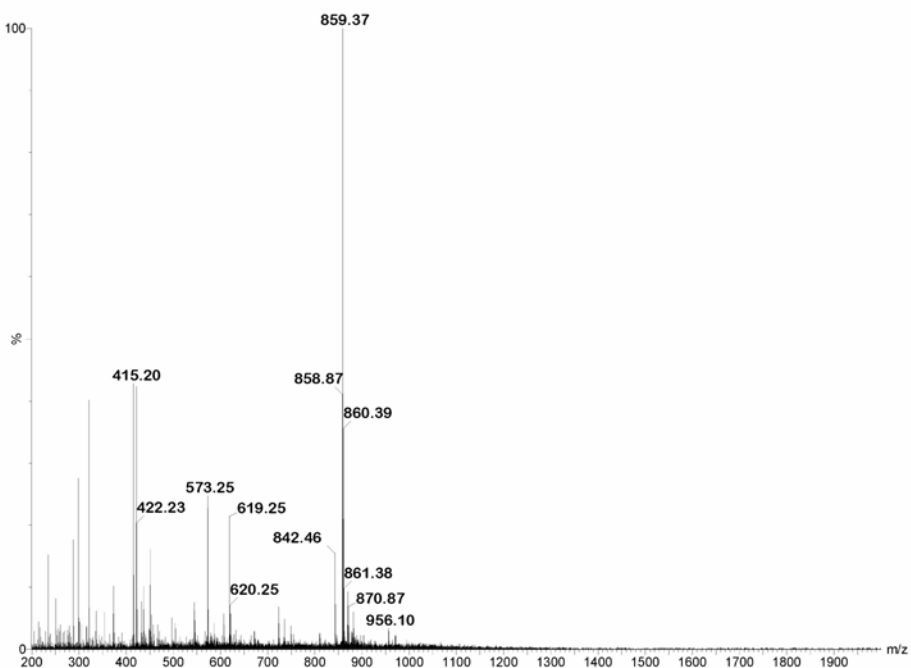

Supplement: supp_M109.006460_Suppdata.pdf [file supp_M109.006460_Suppdata.pdf]
